# Supplementary material for: Triarylmethyl Radical: EPR Signal to Noise at Frequencies between 250 MHz and 1.5 GHz and Dependence of Relaxation on Radical and Salt Concentration and on Frequency
Source: publisher site journal article supplement (doi:10.1515/zpch-2016-0813), 2016-11-18
Supplement: Supplementary file 1 [file zpch-2016-0813_suppl.docx]

Supplementary information to accompany

**Triarylmethyl Radical: EPR Signal to Noise at Frequencies between 250 MHz and 1.5 GHz and Dependence of Relaxation on Radical and Salt Concentration and on Frequency**

Yilin Shi,1 Richard W. Quine,2 George A. Rinard,2 Laura Buchanan,1

Sandra S. Eaton,1 and Gareth R. Eaton1 *

1 Department of Chemistry and Biochemistry, University of Denver, Denver, CO 80210

2 School of Engineering and Computer Science, University of Denver, Denver, CO 80210

Boris Epel,3 Simone Wanless Seagle,3 and Howard J. Halpern3

3 Department of Radiation and Cellular Oncology, University of Chicago, Chicago, IL 60637

**Table S1**. Dependence of *T*1 (μs) for OX063 in 10 mM HEPES buffer or water on radical concentration and frequency at room temperature

|  | OX063 concentration | | | | | |
| --- | --- | --- | --- | --- | --- | --- |
| Fre-quency (MHz) | 0.05 mM  + 154 mM NaCl  +HEPES | 0.1 mM  + 154 mM NaCl  +HEPES | 0.2 mM  + 154 mM NaCl  +HEPES | 0.4 mM  + 154 mM + NaCl  +HEPES | 0.2 mM  +HEPES | 0.2 mM  in water |
| 9200 |  |  |  |  |  | 15* |
| 3100 |  |  |  |  |  | 14* |
| 1500 | 12.6 | 12.3 | 12.3 | 11.7 | 12.7 | 12.1 |
| 970 | 10.9 | 10.6 | 10.9 | 10.4 | 11.1 |  |
| 900 |  | 10.7 | 10.7 | 10.1 | 10.8 |  |
| 800 |  | 10.0 | 9.9 | 9.8 | 10.2 |  |
| 730 |  |  |  |  |  | 9.4† |
| 700 |  | 9.8 | 9.4 | 9.1 | 9.7 |  |
| 610 |  |  |  |  |  | 9.0† |
| 600 |  | 8.9 | 8.8 | 8.3 | 8.9 |  |
| 500 |  | 8.2 | 8.0 | 7.6 | 8.3 |  |
| 250 |  |  |  |  |  | 6.2* |

* Data from R. Owenius et al. [[1](#_ENREF_1)]

† Unpublished results from Joshua R. Biller, University of Denver.

**Table S2**. Dependence of *T*1 (μs) for OX063 in 10 mM HEPES buffer or water on salt concentration, radical concentration, and temperature at 700 MHz

|  | OX063 concentration | | | | | |
| --- | --- | --- | --- | --- | --- | --- |
| Temper-ature | 0.2 mM, no salt | 0.2 mM+  77 mM NaCl | 0.2 mM+  154 mM NaCl | 0.4 mM, no salt | 0.4 mM+  77 mM NaCl | 0.4 mM  + 154 mM NaCl |
| 19o C | 9.8 | 9.5 | 9.5 | 9.6 | 9.4 | 9.3 |
| 37o C | 8.5 | 8.3 | 8.2 | 8.4 | 8.0 | 7.8 |

**Table S3**. Dependence of *T*2 (μs) for OX063 in 10 mM HEPES buffer or water on radical concentration and frequency at room temperature

|  | OX063 concentration | | | | | |
| --- | --- | --- | --- | --- | --- | --- |
| Fre-quency (MHz) | 0.05 mM  + 154 mM NaCl  +HEPES | 0.1 mM  + 154 mM NaCl  +HEPES | 0.2 mM  + 154 mM NaCl  +HEPES | 0.4 mM  + 154 mM NaCl  +HEPES | 0.2 mM  +HEPES | 0.2 mM  in water |
| 9200 |  |  |  |  |  | 6.4* |
| 3100 |  |  |  |  |  | 6.6* |
| 1500 | 6.6 | 6.0 | 5.7 | 5.1 | 6.6 | 7.3 |
| 970 | 6.5 | 6.6 | 6.0 | 5.1 | 6.7 |  |
| 900 |  | 6.4 | 5.9 | 5.1 | 6.7 |  |
| 800 |  | 6.5 | 5.8 | 5.0 | 6.6 |  |
| 700 |  | 6.2 | 5.7 | 4.9 | 6.4 |  |
| 600 |  | 6.2 | 5.7 | 4.7 | 6.3 |  |
| 500 |  | 5.9 | 5.6 | 4.7 | 6.2 |  |
| 250 |  |  |  |  |  | 5.3* |

* Data from R. Owenius, et al.[[1](#_ENREF_1)]

**Table S4.** Dependence of *T*2 (μs) for OX063 in 10 mM HEPES buffer on salt concentration, radical concentration, and temperature at 700 MHz

|  | OX063 concentration | | | | | |
| --- | --- | --- | --- | --- | --- | --- |
| Temper-ature | 0.2 mM, no salt | 0.2 mM+  77 mM NaCl | 0.2 mM+  154 mM NaCl | 0.4 mM, no salt | 0.4 mM+  77 mM NaCl | 0.4 mM  + 154 mM NaCl |
| 19 oC | 6.3 | 5.8 | 5.7 | 5.9 | 5.0 | 4.8 |
| 37 oC | 7.1 | 6.4 | 6.2 | 6.7 | 5.6 | 5.3 |

**Table S5**. Dependence of *T*2 (μs) for OX063 solutions on radical concentration at 250 MHza

|  | *T*2 (μs) | | | | |
| --- | --- | --- | --- | --- | --- |
| OX63 concentration (mM) | water | PBhS | PBS | 10×PBS | Saline |
| 0.2 | 5.52 |  |  |  |  |
| 0.5 | 5.35 | 3.79 | 3.8 |  |  |
| 1 | 3.79 | 3.16 | 2.78 | 2.58 |  |
| 2 | 3.34 | 2.27 | 1.89 | 1.62 | 2.01 |
| 3 |  |  | 1.35 |  |  |
| 4 | 2.70 |  | 1.14 |  |  |
| 5 | 2.03 | 1.14 | 0.92 | 0.84 | 0.97 |
| 7 |  |  | 0.67 |  |  |
| 10 | 1.01 |  | 0.57 |  |  |
| 15 | 0.56 |  | 0.42 |  |  |

a PBhS is phosphate buffer half saline, PBS is phosphate buffered saline (137 mM NaCl and 2.7 mM KCl,  10mM Na2HPO4 and 1.8 mM KH2PO4), and 10xPBS is phosphate buffer with 10x saline, saline is 154 mM NaCl.

**Table S6**. Dependence of *T*2 (μs) for 0.5 mM OX063 solutions on O2 concentration at 250 MHz, room temperature

| O2 concentration | *T*2 (μs) |
| --- | --- |
| 0 | 3.8 |
| 3% | 2.03 |
| 6% | 1.46 |
| 9.28% | 1.22 |
| 21% | 0.64 |

**Table S7**. Frequency dependence of *S/N* (normalized by √*Q*) for OX063 solutions at room temperature

|  | 0.2 mM OX063+154 mM NaCl + 10 mM HEPES | | 0.4 mM OX063 +154 mM NaCl + 10 mM HEPES | |
| --- | --- | --- | --- | --- |
| frequency  (MHz) | *Q* | S/N  (normalized by √*Q*) | *Q* | S/N  (normalized by √*Q*) |
| 990 | 12.7 | 5.7 | 11.0 | 13.6 |
| 900 | 17.1 | 5.4 | 12.8 | 11.0 |
| 800 | 18.6 | 4.6 | 14.7 | 9.9 |
| 700 | 21.8 | 4.3 | 17.7 | 8.7 |
| 600 | 30.2 | 3.3 | 22.0 | 7.1 |
| 500 | 32.4 | 2.9 | 27.6 | 5.9 |
| 440 | 40.0 | 2.0 | 32.5 | 4.7 |

**Table S8**. Dependence of *S/N* (normalized by √*Q*) on salt concentration for OX063 solutions at 700 MHz

|  | OX063 concentration | | | | | |
| --- | --- | --- | --- | --- | --- | --- |
| Temper-ature | 0.2 mM, no salt | 0.2 mM+  77 mM NaCl | 0.2 mM+  154 mM NaCl | 0.4 mM, no salt | 0.4 mM+  77 mM NaCl | 0.4 mM  + 154 mM NaCl |
| 19o C | 7.1 | 4.9 | 5.0 | 13.1 | 8.7 | 8.7 |
| 37o C | 5.8 | 4.7 | 4.9 | 12.2 | 9.0 | 9.7 |

**Table S9**. Relaxation times (*T*1, *T*2, μs) for two trityl radicals (0.2 mM in water) at 250 MHz

| **Trityl-CD3** |  |  |  |  |
| --- | --- | --- | --- | --- |
|  | *T*1 μs | Δ(1/*T*1)a | *T*2 μs | Δ(1/*T*2)b |
| no added salt | 12 |  | 11 |  |
| 118 mM NaCl | 9.5 | 0.022 | 6.9 | 0.054 |
| 150 mM NaCl | 7.9 | 0.043 | 5.7 | 0.084 |
| 150 mM LiCl | 9.0 | 0.028 | 6.7 | 0.058 |
| 150 mM Me4NCl | 9.8 | 0.019 | 5.1 | 0.105 |
|  |  |  |  |  |
| **Trityl-CH3** |  |  |  |  |
| no added salt | 7.9 |  | 7.4 |  |
| 118 mM NaCl | 6.3 | 0.033 | 5.0 | 0.065 |

**a** Δ(1/*T*1) = 1/*T*1 in solution with salt – 1/*T*1 without salt

**b** Δ(1/*T*2) = 1/*T*2 in solution with salt – 1/*T*2 without salt

**Trityl OX063 hyperfine splittings measured with X-band CW EPR**

**Zhelin Yu, Tengzhi Liu, Gareth R. Eaton**

01/26/2015


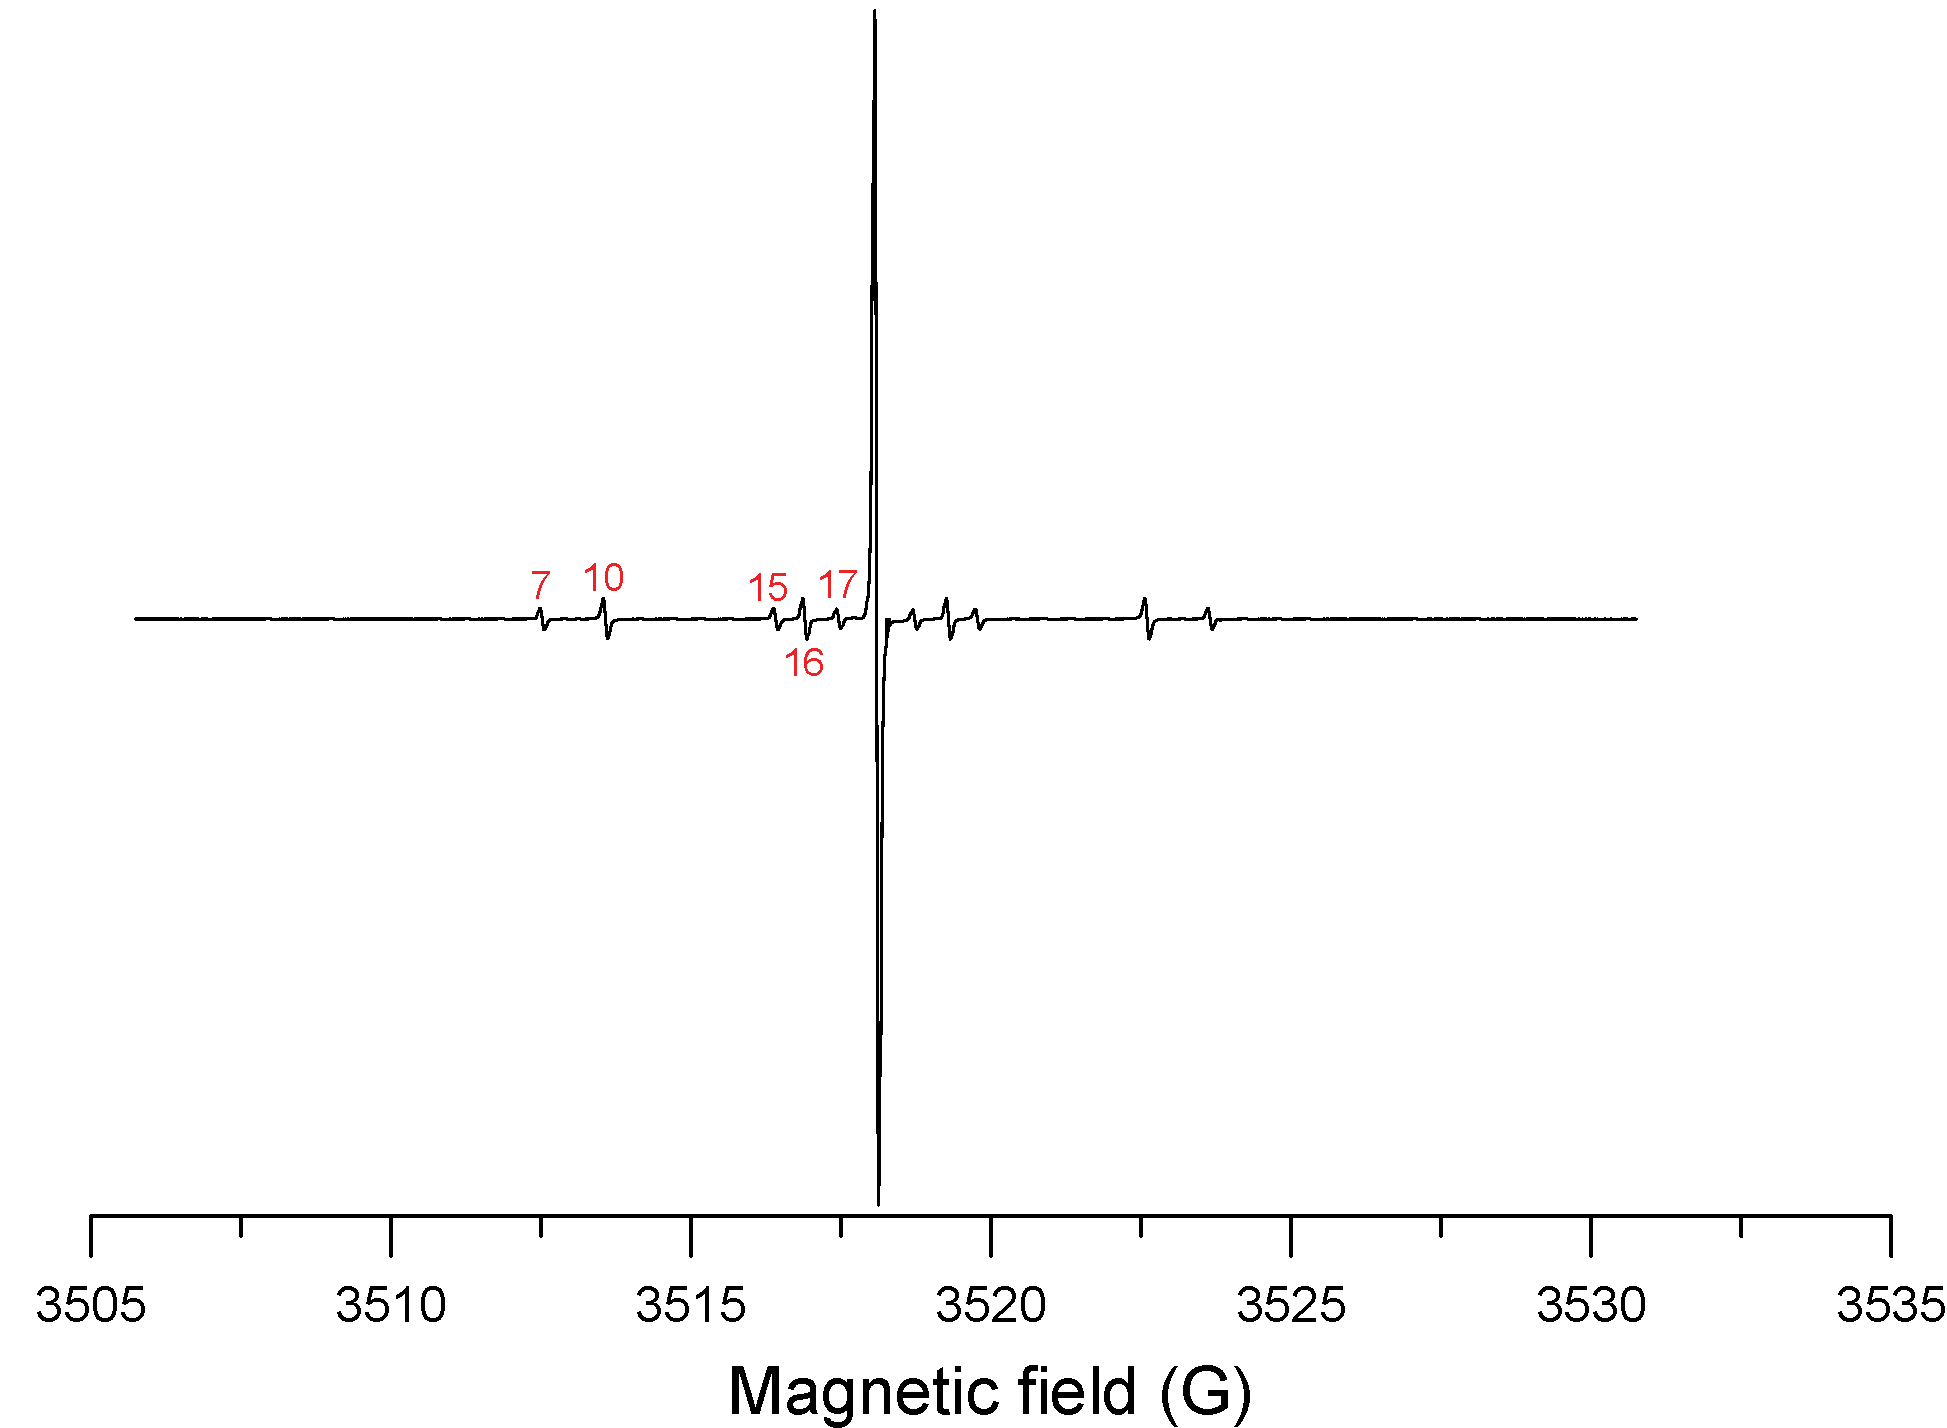


**Figure S1**. X-band (9.858 GHz) CW spectrum of OX063 in water obtained with 0.201 mW power, 0.1 G modulation amplitude at 100 kHz, 167 s scan time, and averaged for 10 scans. Assignments for the numbered lines are listed in **Table S10**.


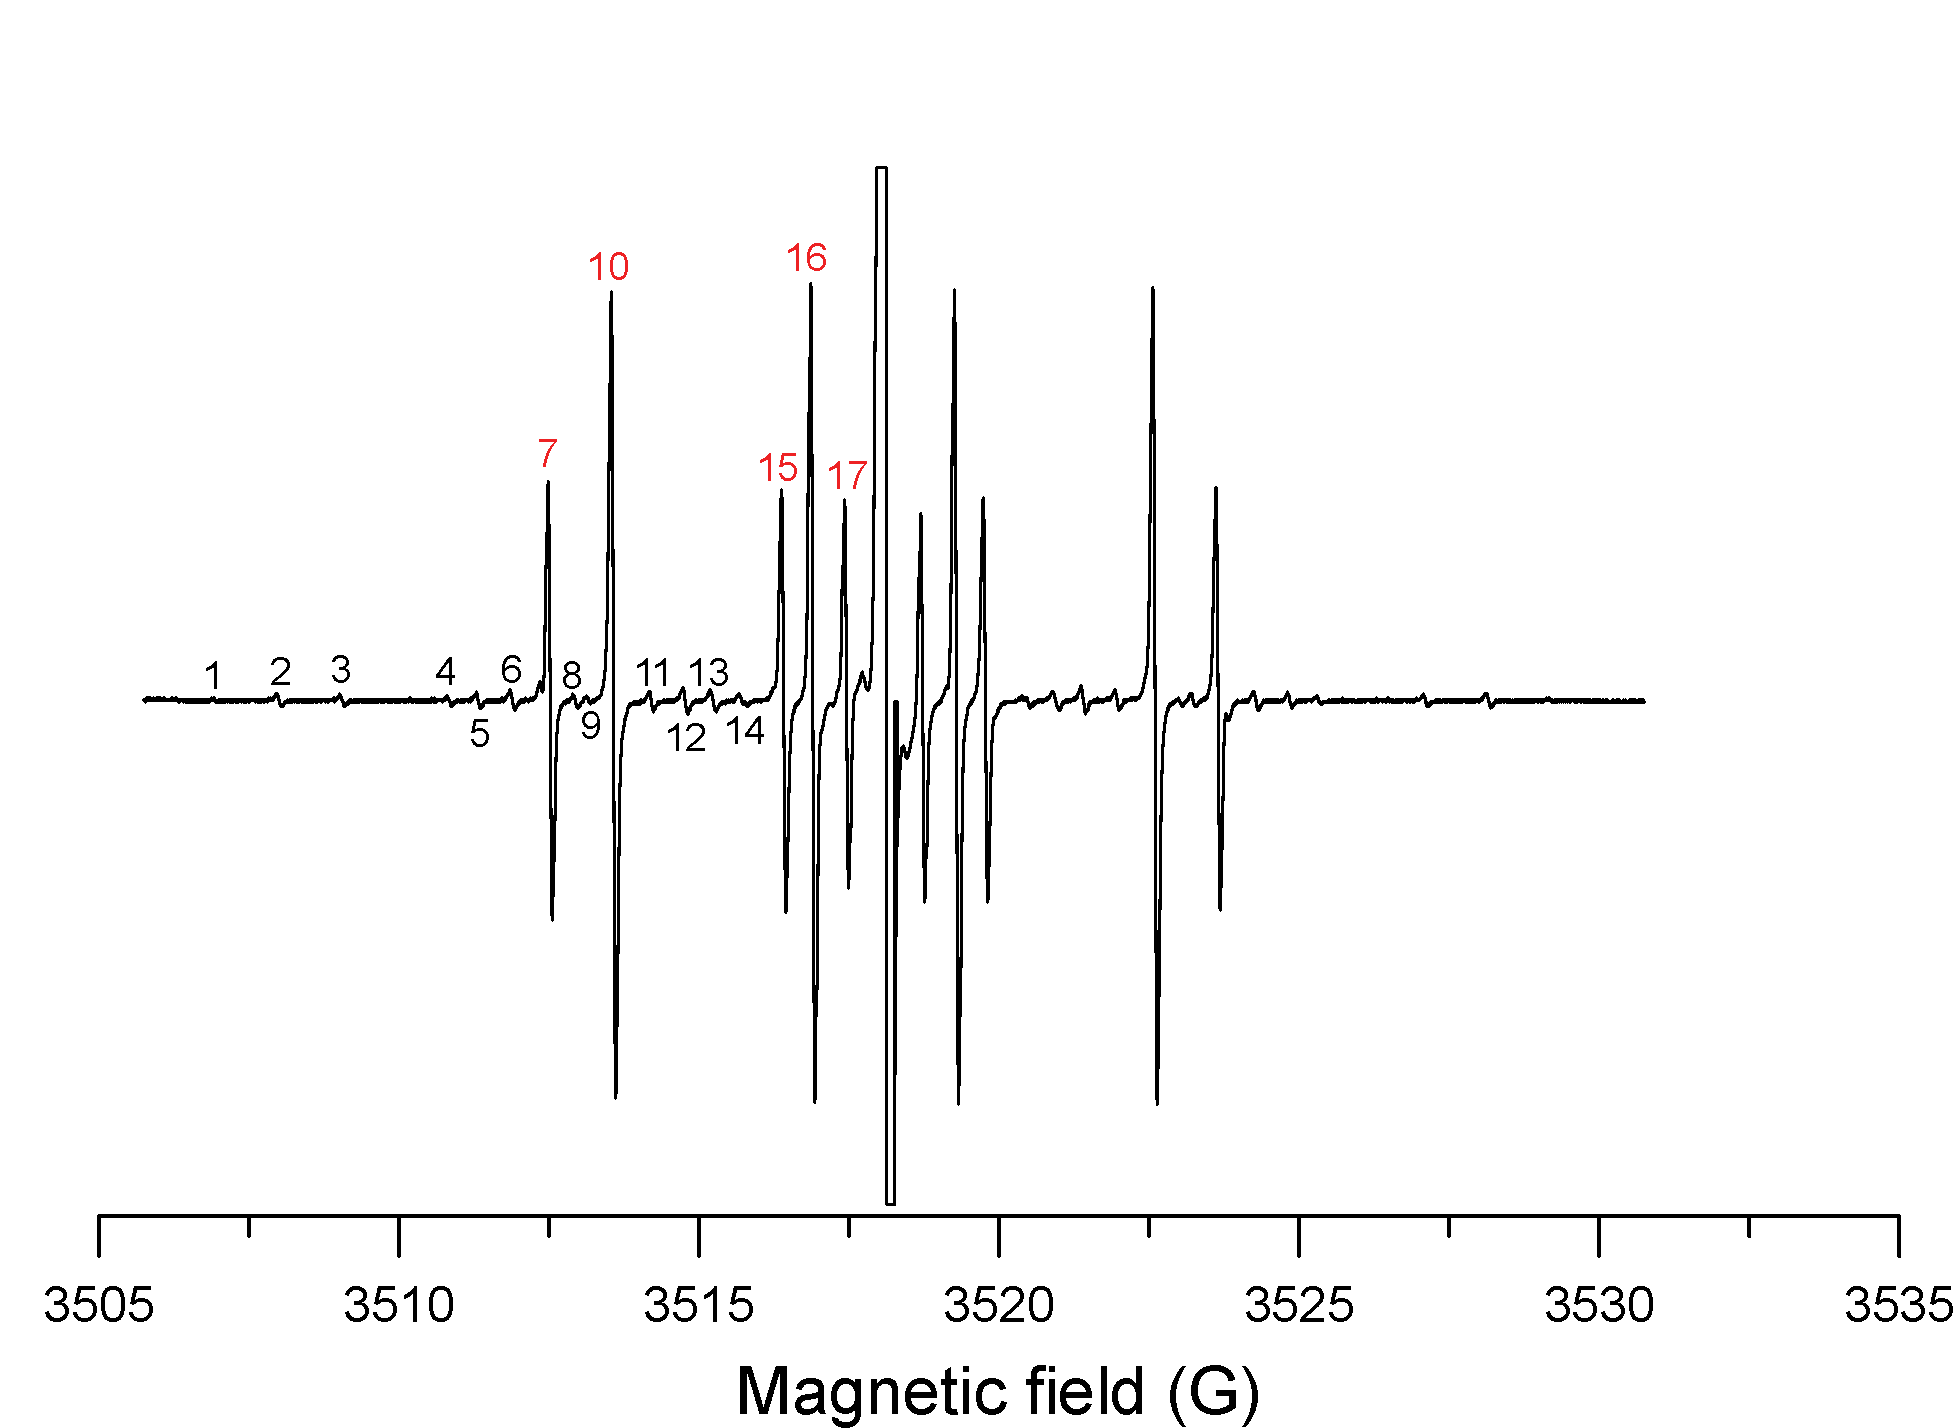


**Figure S2**. The data in **Figure S1** are plotted in Figure S2 with expanded y-axis scale to emphasize the lines with lower amplitude. Assignments for the numbered lines are listed in **Table S10.**

**Table S10**. The 13C hyperfine splittings in the Trityl OX063 spectrum

| No. of 13C  line* | Hyperfine splitting / G | assignment |
| --- | --- | --- |
| 1 | 22.3 | 11.1 + 11.1 |
| 2 | 20.2 | 11.1 + 9.1 |
| 3 | 18.1 | 9.1 + 9.1 |
| 4 | 14.5 | 11.1 + 3.4 |
| 5 | 13.6 | 11.1 + 2.4 |
| 6 | 12.4 | 11.1 + 1.3 |
| 7 ** | 11.1 |  |
| 8 | 10.3 | 9.1 + 1.3 |
| 9 | 9.9 | 11.1 – 1.3 |
| 10 | 9.1 |  |
| 11 | 7.8 | 9.1 – 1.3 |
| 12 | 6.7 | 9.1 – 2.4 |
| 13 | 5.8 | 9.1 – 3.4 |
| 14 | 4.8 | 2.4 + 2.4 |
| 15 | 3.4 |  |
| 16 | 2.44 |  |
| 17 | 1.3 |  |

* Each 13C line was labeled in figure 1 and figure 2.

** The strong 13C lines are highlighted with red color in the table. These are the 13C hyperfine couplings. Since there are so many carbons in the molecule there is a significant probability that two of these carbons are 13C. For these molecules the hyperfine splittings are the sum or difference of two hyperfine coupling constants.

References

1. R. Owenius, G.R. Eaton, S.S. Eaton: J. Magn. Reson. **172**, 168-175 (2005).
